# Supplementary material for: The effect of 3d-electron configuration entropy on the temperature coefficient of redox potential in Co1−zMnz Prussian blue analogues
Source: Royal Society of Chemistry journal article supplement (doi:10.1039/c8dt04338h), 2018-11-13
Supplement: c8dt04338h1.pdf [file c8dt04338h1.pdf]

Supporting information

**Role of  $3d$ -electron configuration entropy on temperature  
coefficients of redox potential in  $\text{Co}_{1-z}\text{Mn}_z$  Prussian Blue analogue**

**Hiroki Iwaizumi<sup>1</sup>, Yusuke Fujiwara<sup>1</sup>, Yuya Fukuzumi<sup>1</sup>,  
and Yutaka Moritomo<sup>1-3\*</sup>**

<sup>1</sup>Graduate School of Pure and Applied Sciences, University of Tsukuba, Tsukuba 305-8571,  
Japan

<sup>2</sup>Faculty of Pure and Applied Sciences, University of Tsukuba, Tsukuba 305-8571, Japan

<sup>3</sup>Tsukuba Research Center for Energy Materials Science (TREMS), University of Tsukuba,  
Tsukuba 305-8571, Japan

Contact information:

Yutaka Moritomo

Graduate School of Pure and Applied Sciences

Faculty of Pure and Applied Sciences, and

Tsukuba Research Center for Energy Materials Science (TREMS)

Univ. of Tsukuba, Tennodai 1-1-1, Tsukuba 305-8571, Japan

Tel & Fax +81-29-853-4337

e-mail: moritomo.yutaka.gf@u.tsukuba.ac.jp

---

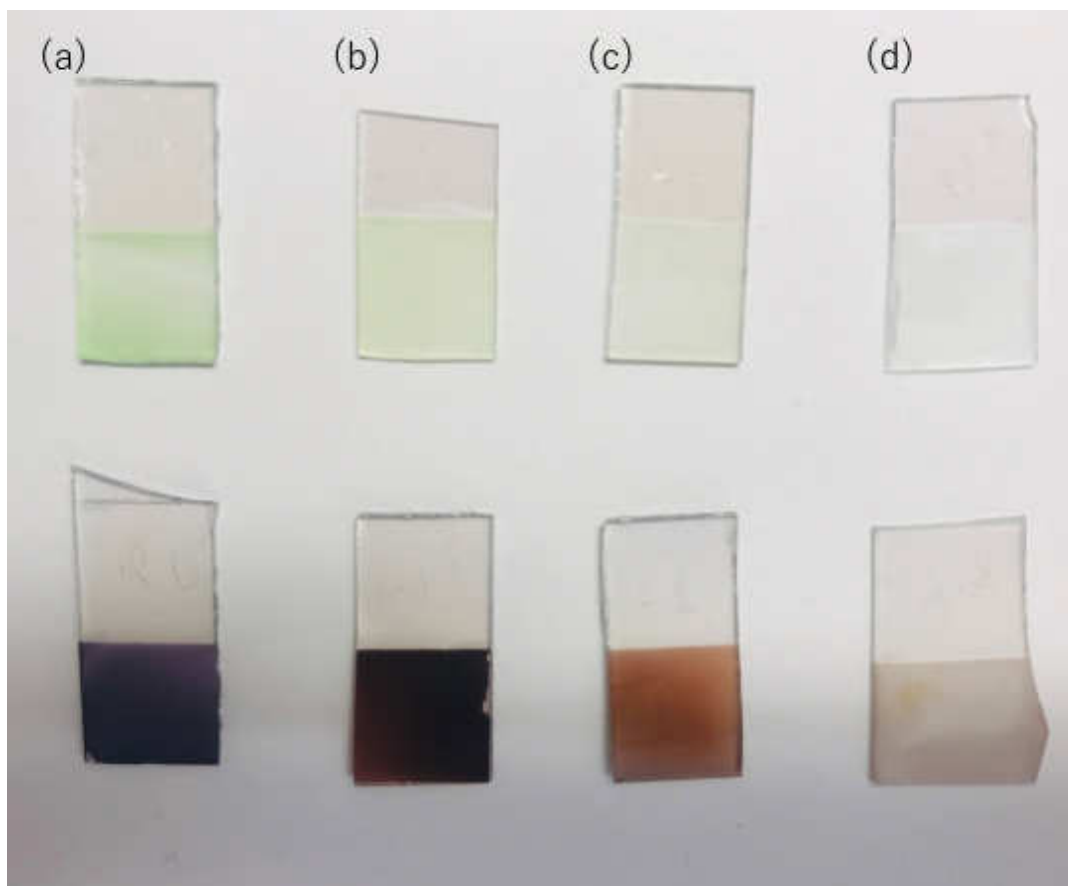

Fig. S1:  $\text{Na}_x\text{Co}_{1-z}\text{Mn}_z[\text{Fe}(\text{CN})_6]_y$  films: (a)  $z = 0.00$ , (b)  $z = 0.56$ , (c)  $z = 0.78$ , and (d)  $z = 1.00$ . Upper and lower films represent the as-grown and  $x$ -controlled films to the middle point of the low- $V$  plateau, respectively.

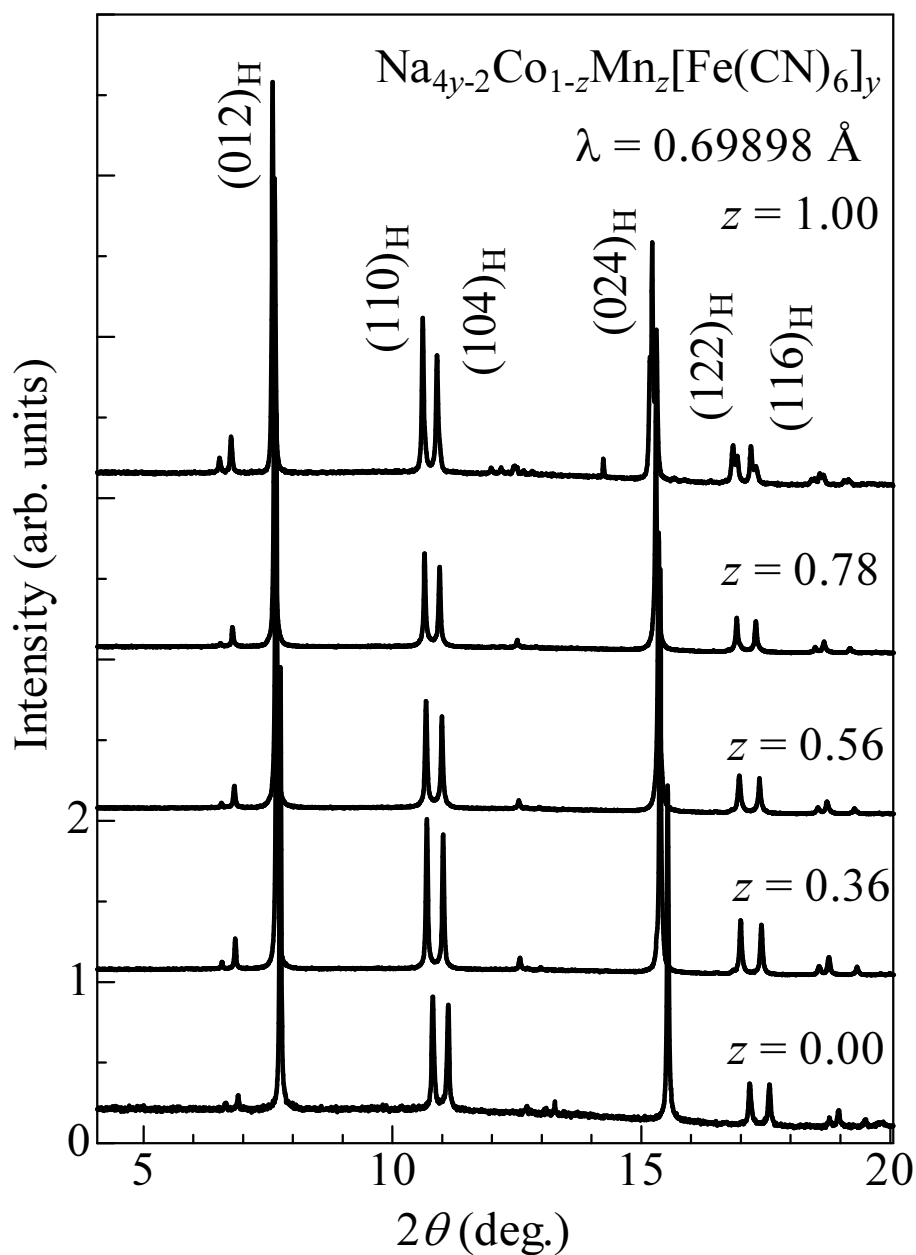

Fig. S2: X-ray powder diffraction (XRD) patterns of the as-grown  $\text{Co}_{1-z}\text{Mn}_z$  Prussian blue analogue ( $\text{Co}_{1-z}\text{Mn}_z\text{-PBA}$ ) film. Values in parentheses represent indexes in the trigonal (hexagonal setting) structures. The XRD patterns were obtained at BL02B2 beamline of SPring-8 with one-dimensional semiconductor detector (MYTHEN, Dectris Ltd.). Typical exposure time was 5 min. The wavelength of the X-rays ( $=0.69898 \text{ \AA}$ ) was calibrated by the cell parameter of a standard  $\text{CeO}_2$  powder.

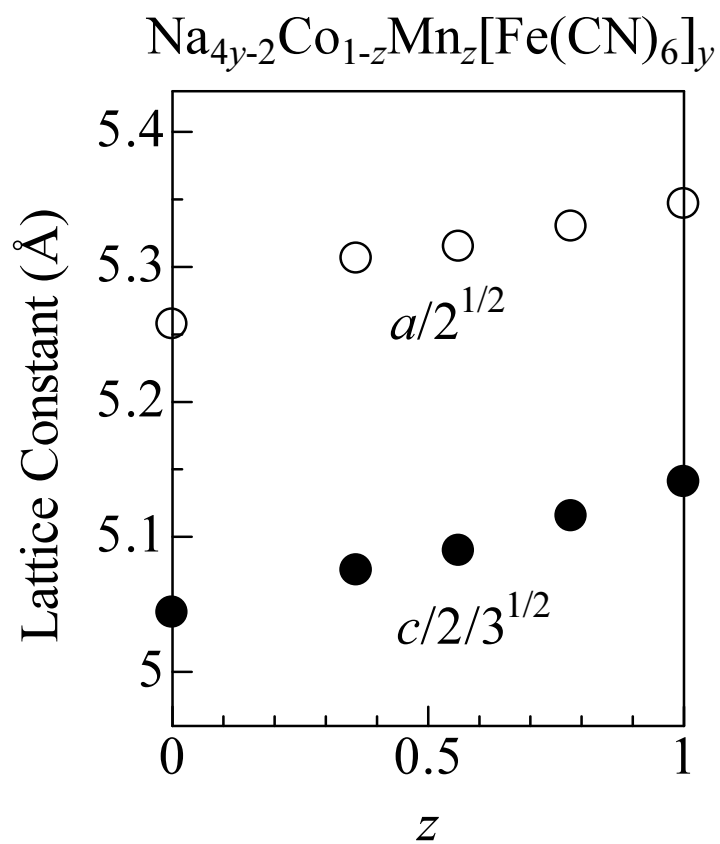

Fig. S3: Lattice constant of the as-grown  $\text{Co}_{1-z}\text{Mn}_z\text{-PBA}$ . The cell parameters were refined using the Rietan-PF program.

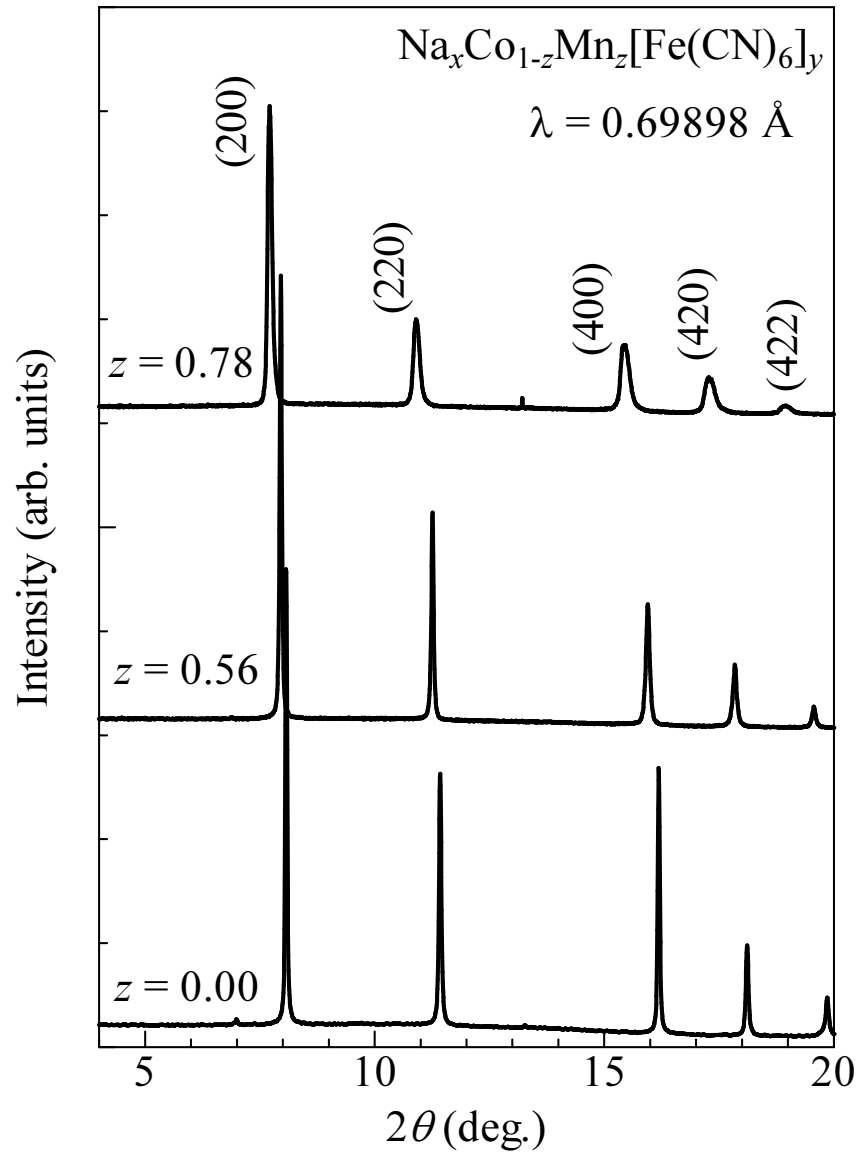

Fig. S4: XRD patterns of the  $x$ -controlled  $\text{Co}_{1-z}\text{Mn}_z\text{-PBA}$  to the boundary between high- $V$  and low- $V$  plateaus. Values in parentheses represent indexes in the face-centered cubic structures. The XRD patterns were obtained at BL02B2 Beamline of SPring-8 with one-dimensional semiconductor detector (MYTHEN, Dectris Ltd.). Typical exposure time was 5 min. The wavelength of the X-rays ( $=0.69898 \text{ \AA}$ ) was calibrated by the cell parameter of a standard  $\text{CeO}_2$  powder.

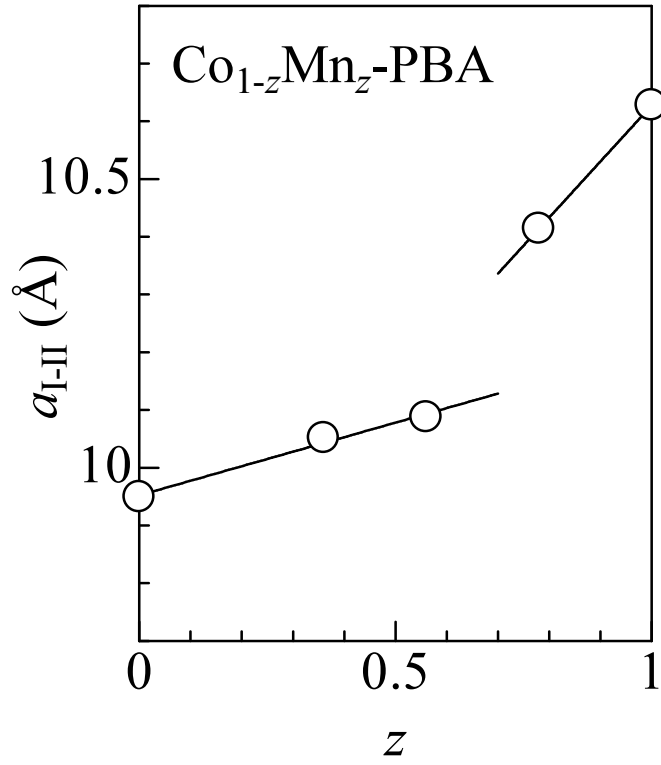

Fig. S5: Lattice constant of the  $x$ -controlled  $\text{Co}_{1-z}\text{Mn}_z\text{-PBA}$  to the boundary between high- $V$  and low- $V$  plateaus against  $z$ . In the whole region of  $z$ , crystal structure was face-centered cubic. The cell parameters were refined using the Rietan-PF program. The straight lines are merely guides to the eyes.
